# Supplementary material
Source: publisher figshare collection journal article supplement (https://acs.figshare.com/ndownloader/files/8799391)
Supplement: Supplementary file 1 [file 8799391]

## Supporting Information:

### **Inhibition of Mitochondrial Bioenergetics by Esterase-Triggered COS/H<sub>2</sub>S Donors**

Andrea K. Steiger,<sup>a</sup> Michela Marcatti,<sup>b</sup> Csaba Szabo,<sup>b</sup> Bartosz Szczesny,<sup>b</sup> Michael D. Pluth<sup>a,\*</sup>

<sup>a</sup> Department of Chemistry and Biochemistry  
Materials Science Institute  
Institute of Molecular Biology  
1253 University of Oregon  
Eugene, OR 97403-1253.

<sup>b</sup> Department of Anesthesiology  
University of Texas Medical Branch  
Galveston, TX 77555, USA.

Contact Information:  
Michael D. Pluth  
pluth@uoregon.edu

| <b>Table of Contents</b>                 | <b>Page</b> |
|------------------------------------------|-------------|
| 1. NMR Spectra                           | S2          |
| 2. Mass Spectrometry Data                | S4          |
| 3. Cytotoxicity of Na <sub>2</sub> S     | S5          |
| 4. Cytotoxicity of 1 and 2 in HeLa cells | S6          |

## NMR Spectra

### *O*-(4-pivaloylbenzyl)-*N*-(*p*-tolyl)thiocarbamate (1)

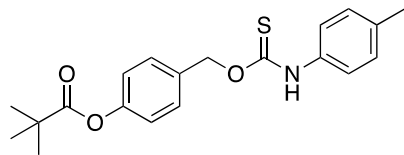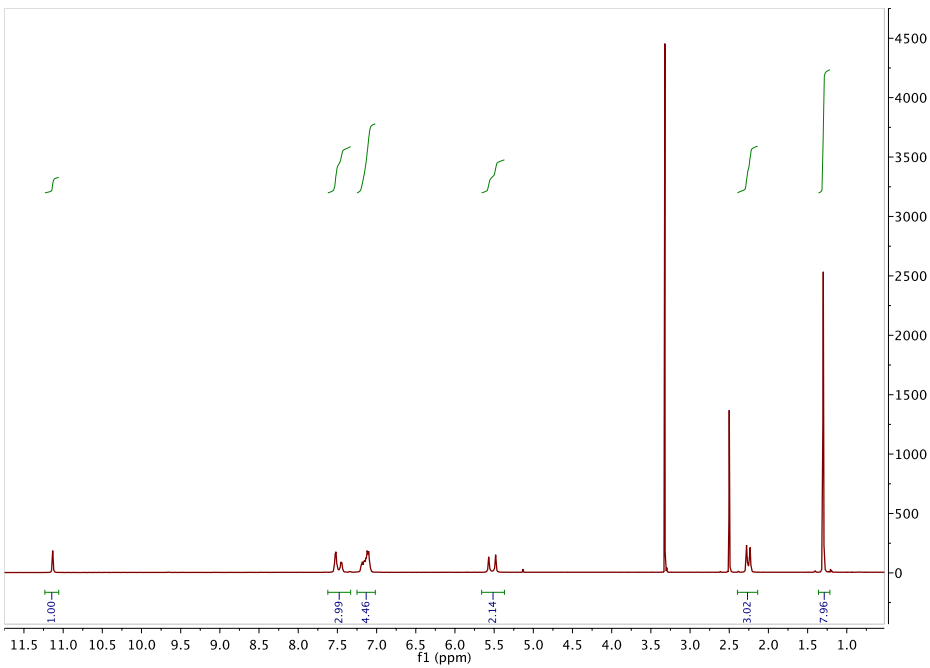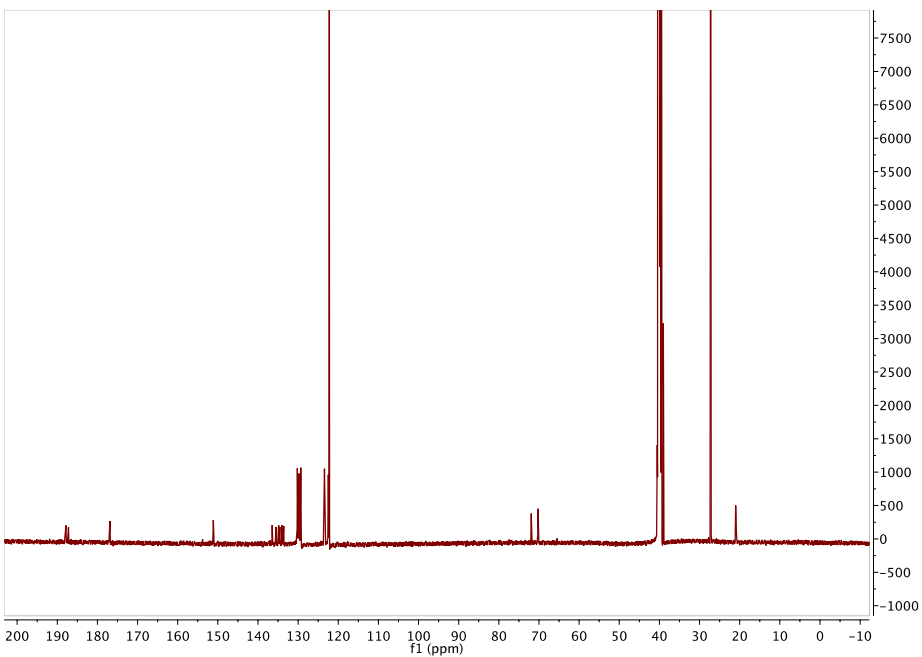

***O*-(4-pivaloylbenzyl)-*N*-(*p*-tolyl)carbamate (2)**

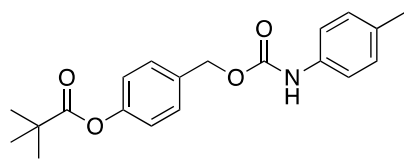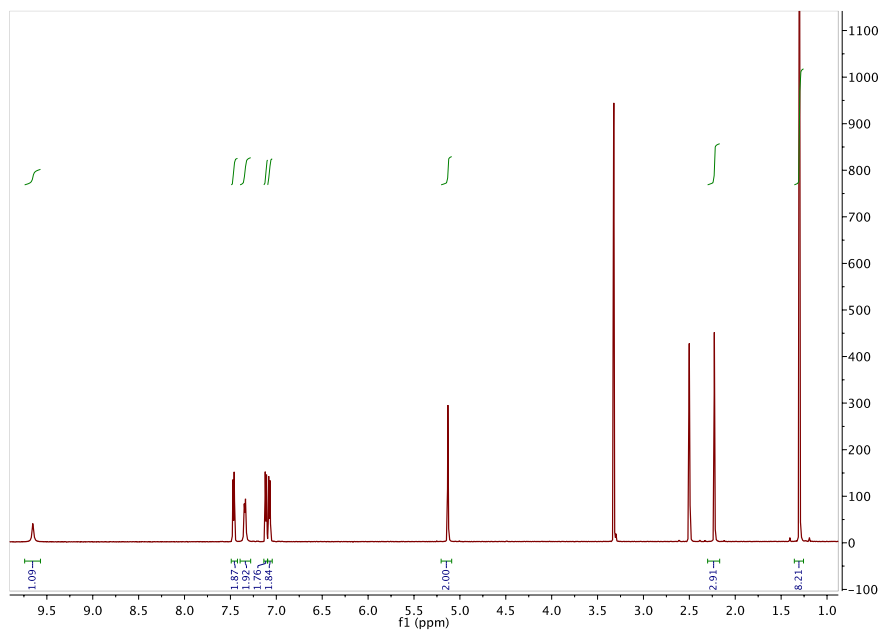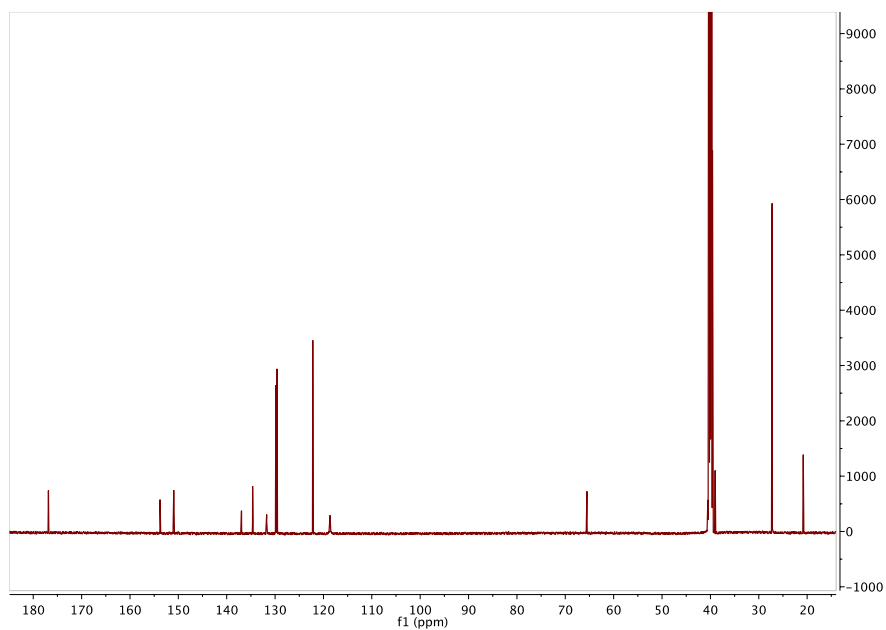

## Mass Spectrometry Data

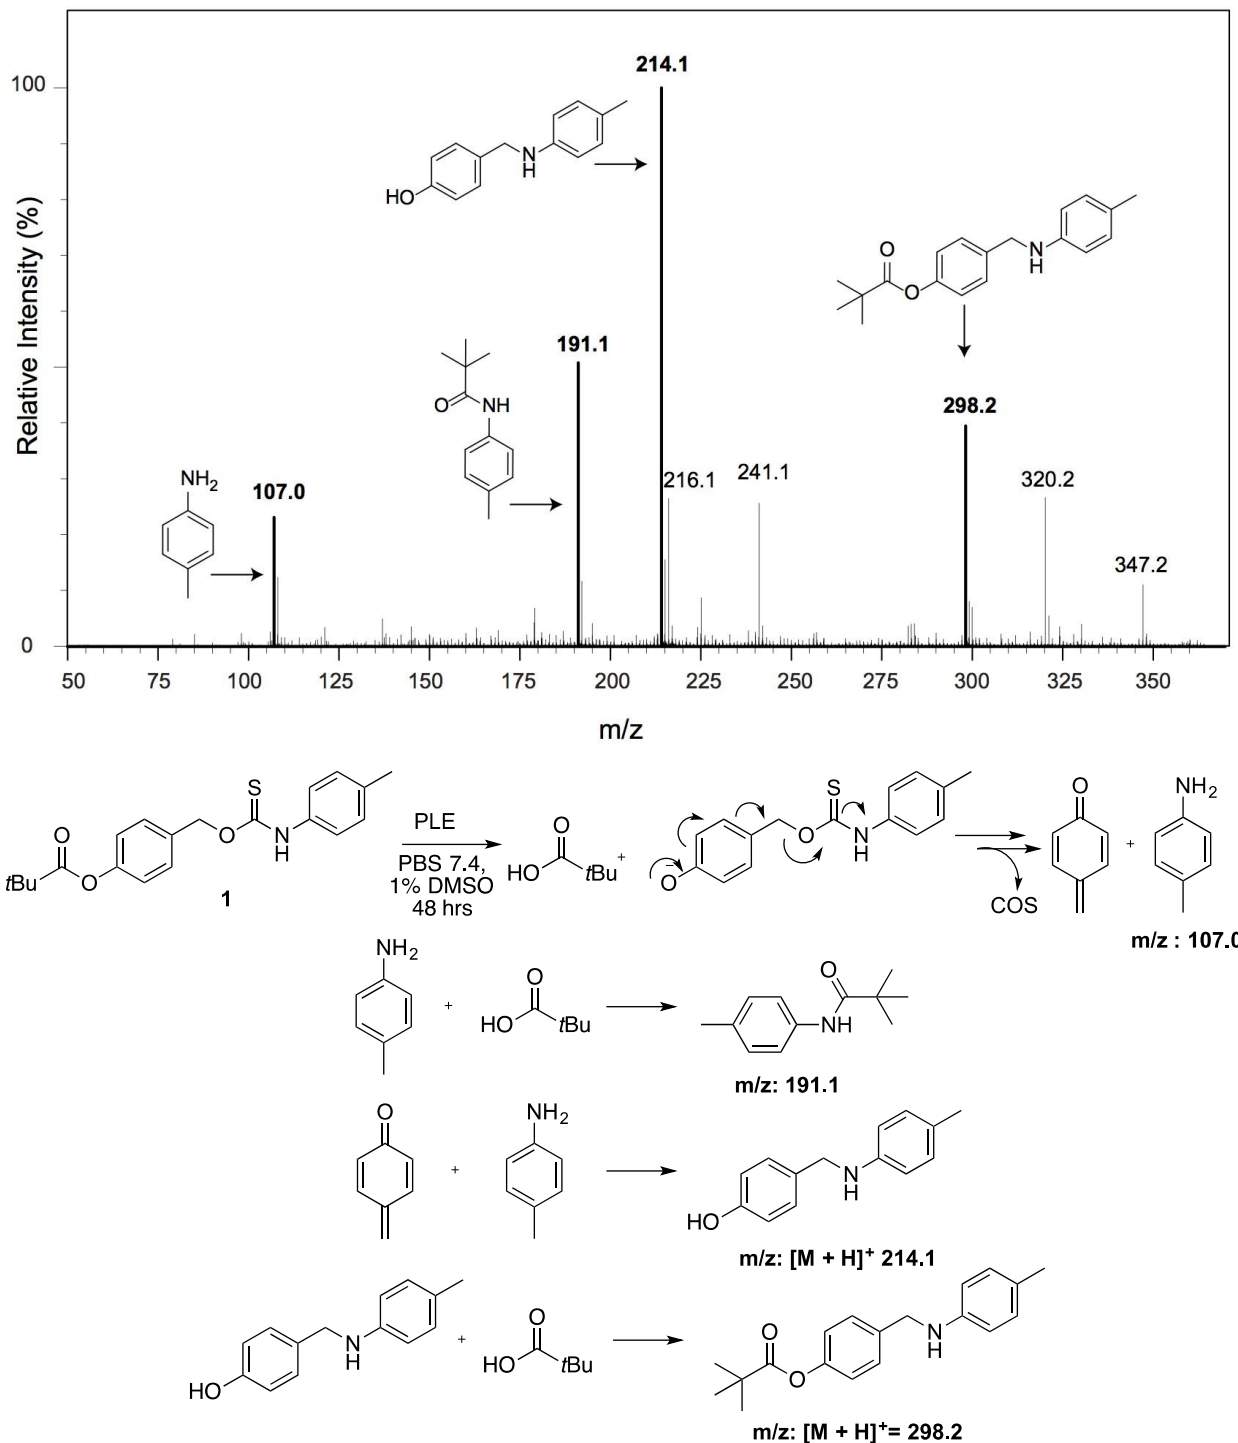

**Figure S1.** Mass spectrum of the reaction byproducts formed after stirring **1** with PLE in PBS buffer (pH 7.4, 1% DMSO) for 48 hours. Structures of potential byproducts have been labeled with their respective masses and reaction schemes detailing formation of these byproducts are shown.

## Cytotoxicity of Na<sub>2</sub>S

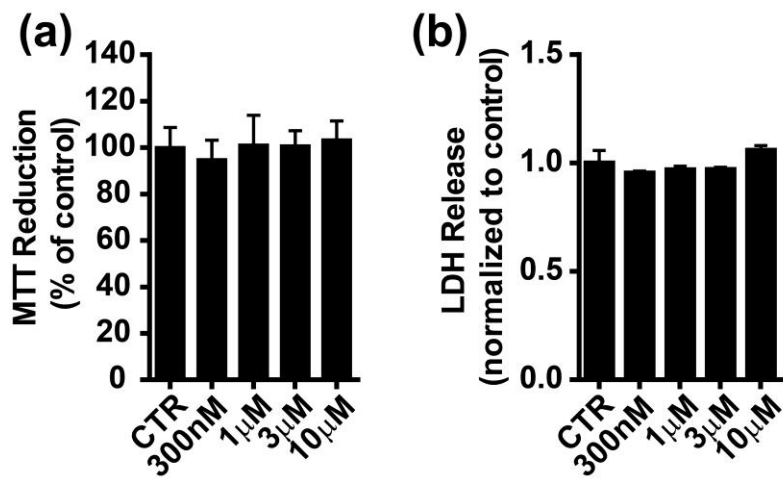

**Figure S2.** Cell viability studies of Na<sub>2</sub>S in BEAS 2B cells using the (a) MTT and (b) LDH cell viability assays.

### Cytotoxicity of 1 and 2 in HeLa cells

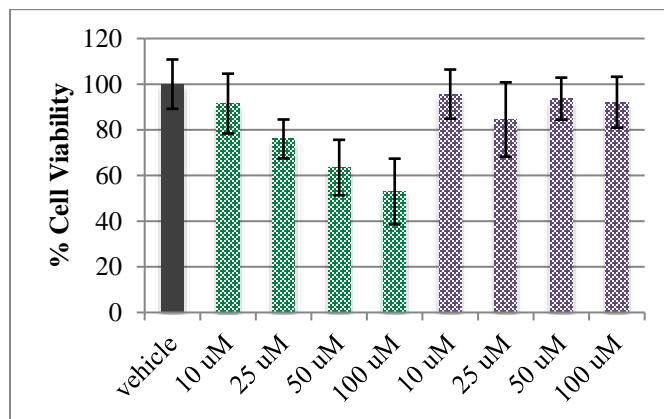

**Figure S3.** Cytotoxicity assay of donor **1** and control compound **2** in HeLa cells using the CCK-8 assay. HeLa cells were cultured in a 96-well plate overnight in Dulbecco's modified Eagle's medium (DMEM) supplemented with 10% fetal bovine serum (FBS) and 1% penicillin/streptomycin at 37 °C under 5% CO<sub>2</sub> and washed with PBS pH 7.4 prior to incubation in FBS-free DMEM containing vehicle (0.5% DMSO, black bar), **1** (green bars, 10-100 μM), or **2** (purple bars, 10-100 μM) for 1 hour. CCK-8 solution (10% in FBS-free DMEM) was added to each well, and cells were incubated for 3 hours at 37 °C. The absorbance at 450 nm was measured using a microplate reader. The cell viability was measured and normalized to the vehicle group. Results are expressed as mean ± SD (n=6).
